# Supplementary material for: Assessment of the Analytical Sensitivity of 10 Lateral Flow Devices against the SARS-CoV-2 Omicron Variant
Source: PubMed Central journal article supplement (PMC8849215; doi:10.1128/jcm.02479-21), 2022-02-16
Supplement: jcm.02479-21-s0001.pdf [file jcm.02479-21-s0001.pdf]

## **SUPPLEMENTARY APPENDIX**

### **Assessment of the analytical sensitivity of ten lateral flow devices against the SARS-CoV-2 omicron variant**

#### ***SARS-CoV-2 cell culture***

SARS-CoV-2 Delta (VIC/18440/2021) was originally isolated from residual viral transport medium from a reverse transcriptase PCR (RT-PCR)-positive swab collected in April 2021 in the Victorian Infectious Diseases Reference Laboratory (GISAID Accession ID: EPI\_ISL\_1913206). SARS-CoV-2 Omicron (80-21-331-3676) was kindly provided by the NSW Health Pathology-Institute of Clinical Pathology and Medical Research (ICPMR), Westmead, NSW, Australia. Full genome sequencing and bioinformatic analysis determined the lineage as B.1.1.529 (Omicron) (GISAID Accession ID: EPI\_ISL\_6814922). To prepare the stock used in this study, 100µL of virus isolate was added to 2 x T25 flasks of Calu-3 cells grown to 80% confluency and allowed to absorb for 30mins at 37°C. 10mL of Calu-3 infection media (DMEM/F-12, supplemented with GlutaMAX *Gibco*, 2% heat inactivated FBS) was added to each flask and cells incubated at 37°C. When CPE was observed (approximately 48-72 hours post infection) supernatant from each flask was harvested, combined and cell debris removed by centrifugation. Aliquots of virus were stored at -80°C. Quantification of the dilution series was performed by real-time RT-PCR and droplet digital PCR (ddPCR), using previously described methods (1).

**Supplementary Table 1. Antigen tests evaluated in this study, with assay-specific sample and diluent volumes.**

| Test # | Test Name                                                            | Manufacturer                                                | Time (mins) | Buffer volume ( $\mu\text{L}$ ) |        |             |
|--------|----------------------------------------------------------------------|-------------------------------------------------------------|-------------|---------------------------------|--------|-------------|
|        |                                                                      |                                                             |             | Extraction                      | Sample | Assay input |
| 1      | Panbio™ COVID-19 Ag Rapid Test Device (Nasal)                        | Abbott Rapid Diagnostics Jena GmbH (Germany)                | 15          | 150                             | 150    | 130         |
| 2      | NowCheck COVID-19 Antigen Test                                       | BioNote Inc (Korea - Republic of)                           | 15-30       | 300                             | 300    | 50          |
| 3      | SARS-CoV-2 Rapid Antigen Test                                        | SD Biosensor Inc (Korea - Republic of)                      | 15-30       | 300                             | 350    | 50          |
| 4      | STANDARD™ Q COVID-19 Ag Test                                         | SD Biosensor Inc (Korea - Republic of)                      | 15-20       | 300                             | 300    | 50          |
| 5      | Surescreen Diagnostics COVID-19 Antigen Rapid Test Cassette          | BTNX Inc (Canada)                                           | 15          | 300                             | 300    | 80          |
| 6      | VivaDiag™ SARS-CoV-2 Ag Rapid Test                                   | VivaChek Biotech (Hangzhou) Co Ltd (China)                  | 15-20       | 300                             | 300    | 60          |
| 7      | Wantai SARS-CoV-2 Ag Rapid Test (Colloidal Gold)                     | Beijing Wantai Biologicalpharmacy Enterprise Co Ltd (China) | 20-30       | 60                              | 300    | 100         |
| 8      | Testsea SARS-CoV-2 Antigen Test Kit                                  | Hangzhou Testsea Biotechnology Co Ltd (China)               | 10-15       | 300                             | 300    | 55          |
| 9      | InnoScreen COVID-19 Antigen Rapid Test Device                        | Innovation Scientific Pty Ltd (Australia)                   | 15          | 400                             | 400    | 100         |
| 10     | LYHER Novel Coronavirus (Covid-19) Antigen Test Kit (Colloidal Gold) | Hangzhou Laihe Biotech Co Ltd (China)                       | 15          | 250                             | 250    | 100         |

## REFERENCES

1. Deerain JM, Tran T, Batty MB, Yoga Y, Druce J, Mackenzie C, et al. Assessment of twenty-two SARS-CoV-2 rapid antigen tests against SARS-CoV-2: A laboratory evaluation study. medRxiv. 2021:2021.12.15.21267691.
